# Serum lipidome associates with neuroimaging features in patients with traumatic brain injury

Ilias Thomas<sup>1,\*</sup>, Virginia F. J. Newcombe<sup>2,\*</sup>, Alex M. Dickens<sup>3,4,\*</sup>, Sophie Richter<sup>2</sup>, Jussi P. Posti<sup>5</sup>, Andrew I. R. Maas<sup>6</sup>, Olli Tenovu<sup>7</sup>, Tuulia Hyötyläinen<sup>8</sup>, András Büki<sup>1</sup>, David K. Menon<sup>2,†</sup>, Matej Orešič<sup>1,3,†</sup>; CENTER-TBI MR subgroup Participants and Investigators

<sup>1</sup>School of Medical Sciences, Faculty of Medicine and Health, Örebro University, Örebro, Sweden

<sup>2</sup>Division of Anaesthesia, Department of Medicine, University of Cambridge, Cambridge, UK.

<sup>3</sup>Turku Bioscience Centre, University of Turku and Åbo Akademi University, Turku, Finland

<sup>4</sup>Department of Chemistry, University of Turku, Turku, Finland

<sup>5</sup>Neurocenter, Department of Neurosurgery and Turku Brain Injury Center, Turku University Hospital and University of Turku, Finland

<sup>6</sup>Department of Neurosurgery, Antwerp University Hospital and University of Antwerp, Edegem, Belgium

<sup>7</sup>Neurocenter, Department of Neurology and Turku Brain Injury Center, Turku University Hospital and University of Turku, Finland

<sup>8</sup>School of Science and Technology, Örebro University, Örebro, Sweden

\*These authors contributed equally to this work.

†These authors contributed equally to this work.

Correspondence to: Matej Orešič

School of Medical Sciences, Faculty of Medicine and Health, Örebro University, 702 81 Örebro, Sweden

E-mail: [matej.oresic@oru.se](mailto:matej.oresic@oru.se)

Correspondence may also be addressed to: David K. Menon

E-mail: [dkm13@cam.ac.uk](mailto:dkm13@cam.ac.uk)

NOTE: This preprint reports new research that has not been certified by peer review and should not be used to guide clinical practice.

## Abstract

Acute traumatic brain injury (TBI) is associated with substantial metabolic abnormalities, both centrally and in the periphery. We have previously reported extensive changes in the circulating metabolome resulting from TBI, including changes proportional to disease severity and associated with patient outcomes. The observed metabolome changes in TBI likely reflect several pathophysiological mechanisms supporting the concept that TBI is a systemic disease after the primary injury. However, one of the main metabolic changes we have observed following a TBI are changes in lipids, including the structural lipids that are known to be present in the myelin in the brain.

Here, we conducted a study to investigate the relationship between traumatic microstructural changes in white matter seen on magnetic resonance imaging (MRI) and quantitative lipidomic changes in the blood in a subset of patients with TBI recruited to the MRI sub-study of the Collaborative European NeuroTrauma Effectiveness Research in TBI (CENTER-TBI) study.

In total, there were 103 patients who had both a magnetic resonance imaging (MRI) scan and serum samples available for analysis. From serum, 201 known lipids were quantified. Diffusion tensor fitting generated fractional anisotropy (FA) and mean diffusivity (MD) maps for the MRI scans, in addition to volumetric data. Association matrices and partial correlation networks were built to elucidate the connections between the lipid groups and the maps.

We found that there are distinct directions of associations between the neuroimage data (FA and MD sets) and the concentrations of circulating lipids after injury. The FA and MD values were in inverse relationship with the severity of TBI (higher MD values, lower FA). We also observed that the lipid associations to FA and MD show different metabolic signatures. Lysophosphatidylcholines (LPC) associate mostly with FA while sphingomyelins (SM) associate with MD. Only phosphatidylcholines (PC) have strong associations with both as well as with the volumetric data. Finally, we found that the lipid changes are not associated with the number of regions with abnormalities.

In conclusion, we have identified groups of lipids which associate with specific MRI imaging metrics following TBI. There appears to be consistent patterns of lipid changes associating with the specific microstructure changes in the CNS white matter. There is also a pattern of lipids with regional specificity, suggesting that blood-based lipidomics may provide an insight into the underlying disease mechanisms in TBI.

**Keywords:** lipidomics, magnetic resonance imaging, traumatic brain injury

**Abbreviations:** CE, cholesterol ester; Cer, ceramide; CT, computed tomography; FA, fractional anisotropy measures; LPC, lysophosphatidylcholine; MD, mean diffusivity; MS, mass spectrometry; PC, phosphatidylcholine; PS, phosphatidylserine; SM, sphingomyelin; TBI, traumatic brain injury; TG, triacylglycerol.

## Introduction

Traumatic brain injury (TBI) affects over 50 million people worldwide every year<sup>1,2</sup>. Despite being so common, the dynamic pathophysiology and determinants of outcome trajectories remain poorly understood; TBI has been described as the most complex disease in the most complex organ<sup>3</sup>. This is particularly true when attempting to understand the changes that may occur in circulating metabolites after TBI. Understanding these metabolic abnormalities is critical, since such knowledge might allow us to design and evaluate novel therapies. Indeed, we already know that TBI is associated with substantial metabolic abnormalities, which have been mainly demonstrated in humans using positron emission tomography<sup>4,5</sup> and magnetic resonance spectroscopy<sup>6,7</sup>. However, these techniques are expensive and logistically demanding, and are thus not suitable for large studies or broad clinical implementation.

Metabolomic and lipidomic analysis of systemic blood provides one convenient approach to address this issue. We have previously reported extensive changes in the circulating metabolome resulting from TBI, including changes proportional to disease severity and associated with patient outcomes<sup>8-10</sup>. The observed metabolome changes in TBI likely reflect several pathophysiological mechanisms supporting the concept that TBI is a systemic disease. However, one of the main metabolic changes we have observed following a TBI are changes in lipids<sup>10</sup>, that are known to be present in the myelin in the brain. Myelin is rich in lipids which constitute approximately 80% of the dry weight of myelin, and this makes changes in lipid profile a prime target for characterizing damage to the brain. Previously, the correlations that we have demonstrated between metabolomics and lipidomic changes and computed tomography (CT) are limited, since CT does not characterize microstructural abnormalities. Furthermore, CT does not provide any detailed information on the state of the myelin in the central nervous system (CNS) and therefore, associating the lipid changes with damage to the myelin is challenging especially since this is an important driver of outcome<sup>11</sup>.

Magnetic resonance imaging (MRI) has the potential to characterize microstructural damage and improve our understanding of the pathophysiology underlying different metabolomic profiles after TBI. This technique provides researchers with a window into the axonal and myelin health in the CNS. In particular, advanced quantitative MRI, including diffusion tensor imaging (DTI), have been shown to be sensitive to injury after TBI, and has been associated with the severity of injury and outcome<sup>12-14</sup>. DTI in particular is able to detect microstructural damage especially in the white matter., which may provide insights into the pathophysiology

of injuries<sup>15</sup>. Combining this information with lipid measures from the blood will allow us to better understand how changes in the myelin in the CNS can impact the host lipidome profile. Previous studies have demonstrated that circulating lipids can be utilized as a biomarker for microvascular disease<sup>16</sup>. In assessing the acute phase of TBI and the aftermath thereafter, lipidomic profiling may provide more information about the integrity of brain connectivity and, more generally, brain health.

Here we report a study to investigate the relationship between traumatic microstructural changes in the brain seen on MRI and quantitative lipidomic changes in the blood in a subset of patients recruited to the MRI sub-study of the Collaborative European NeuroTrauma Effectiveness Research in TBI (CENTER-TBI) study.

## Materials and methods

### Study participants

The CENTER-TBI study recruited 4509 patients from 18 European countries and Israel (<https://www.center-tbi.eu/>, registered at [clinicaltrials.gov NCT02210221](https://clinicaltrials.gov/ct2/show/study/NCT02210221))<sup>17</sup>. The CENTER-TBI database contains data from 65 centers whose data were collected between December 19, 2014, and December 17, 2017. Ethical approval was obtained by each site in accordance with their local regulations (for details see <https://www.center-tbi.eu/project/ethical-approval>). Informed consent was obtained from all study participants or their legal representatives/relatives according to the local regulations of each center. Clinical data was accessed via the Neurobot platform (RRID/SCR\_017004, core data, version 3.0; International Neuroinformatics Coordinating Facility; released November 24, 2020).

Patients were included in the analysis for this study if they were aged  $\geq 18$  years, had blood samples taken within 24 hours of injury and had an MRI scan performed within four weeks of injury. For patients who had multiple MRI scans, the earliest one was used. Imaging data from healthy controls were used to harmonize imaging data and detect MRI abnormalities. In total data from 104 healthy controls were used (Table 1), and more are provided in the following sections. All severities of TBI were included. Patients who had significant preexisting neurological disorders were excluded.

In total there were 103 patients that had both an MRI scan and blood samples available for analysis.

A flowchart of all the analyses and data acquisition can be seen in Fig. 1.

## Analysis of lipids

Blood samples of the patients were drawn within 24 hours of injury and were analyzed at Örebro University, Sweden.

Blood samples were collected using gel-separator tubes for serum and centrifuged within 60 minutes. Serum was processed, aliquoted ( $8 \times 0.5$  ml, one freeze-thaw cycle), and stored at  $-80$  °C locally and at the central CENTER-TBI biobank (Pécs, Hungary)<sup>18</sup> until shipment on dry ice to Örebro University, Sweden for analysis.

The lipidomic platform for data analysis in this study has been described in detail elsewhere<sup>10</sup>. The analysis was performed with an adjusted version of the Folch procedure<sup>19</sup>. The internal standards used, the calibration curves, the instrument description, and the sample analysis using ultra-high-performance liquid chromatography quadrupole time-of-flight mass spectrometry are the same as described previously<sup>10</sup>. In total, 201 known lipids were quantified that belong to the major lipidomic functional groups including ceramides (Cer), lysophosphatidylcholines (LPC), phosphatidylcholines (PC), sphingomyelins (SM), and triacylglycerols (TG).

## Image acquisition, processing, and harmonization

Images were acquired on nine 3T MRI scanners across eight sites, using study specific protocols the details of which can be found at: <https://www.center-tbi.eu/project/mri-study-protocols><sup>20</sup>. Sequences included volumetric T1-weighted MPRAGE (voxel size 1 mm), volumetric fluid-attenuated inversion recovery, T2-weighted, susceptibility-weighted imaging and DTI. Base values of DTI were 2-mm isotropic voxels, 32 noncollinear directions, and a  $b$  value of 1000 seconds/mm<sup>2</sup>.

MRI images were reported centrally for the visible presence of lesions according to the Common Data Element (CDE) scheme for TBI (<https://commondataelements.ninds.nih.gov/>)<sup>21,22</sup>. Patients were classified as having a clinically abnormal MRI when at least one intracranial lesion secondary to TBI was detected.

All images were processed on a TBI-specific pipeline<sup>23</sup>. Images underwent neck cropping and were corrected for bias field inhomogeneity. Diffusion images were corrected for noise, artefacts (Gibbs, head motion and eddy currents)<sup>24-27</sup> and inhomogeneities in the magnetic field<sup>28</sup>. Diffusion tensors were fitted via weighted least-squares to generate fractional anisotropy (FA) and mean diffusivity (MD) maps using fsl (<https://fsl.fmrib.ox.ac.uk>). These were non-linearly co-registered using ANTS (<http://stnava.github.io/ANTs/>) to the JHU-ICBM

FA template<sup>29</sup> to extract mean FA and MD measures for the regions of interest (Supplementary Table 2).

Differences in sites and scanners were corrected for using ComBat harmonization,<sup>30,31</sup> a statistical technique to minimize unwanted scanner effect while preserving the biological variability, for the FA and MD sets (based on the healthy controls). The values of the volumetric data were normalized per patient, dividing each patients ROI values by their respective total brain volume.

For the remainder of this manuscript the 51 ROI brain volumetric segmentation will be referred to as the volumetric set, the JHU DTI-based white-matter FA map as the FA set, and the JHU DTI-based white-matter MD map as the MD set.

## Statistical analysis

All statistical analyses for this work were performed in the R statistical program version 4.1.2.

### Frequency matrices

A correlation analysis of the frequencies of the relationships was performed for the quantitative diffusivity metrics (FA and MD) features to determine which ROI were the most frequently correlated with the lipids; and to determine if there was a topological association between the brain and the lipid concentrations. For each lipid/ROI combination the Pearson correlation was calculated together with the corresponding p-values. The correlations that were not significant after Holm correction were filtered out, through the *rcorr.adjust* function in the *RcmdrMisc* package. The final table had the 201 lipids by the ROIs that had significant correlations with each lipid. These remaining ROIs in the frequency table were then summed to ascertain which have the most frequent significant associations with the different lipids.

Furthermore, for each ROI, after the frequencies were calculated, it was determined if it was overall positively or negatively associated with the lipid concentrations (based on the mean value of correlations). A frequency beanplot of the ROIs was created to show the level of the associations of the ROIs with the lipids and whether their values tend to increase or decrease in relation to the concentration values of the lipids. Positive correlation in this context means that the FA and lipid values move in the same direction, *i.e.*, both are reduced.

### Classification models

We sought to determine whether lipidomic changes could predict whether intracranial lesions were detected on the MRI (MRI positive) or not (MRI negative) in both the full set of patients (CT positive and negative,  $n = 102$ ), and as a secondary analysis in patients with no abnormalities on CT ( $n = 44$ ).

A filtering process was applied to find a subset of lipids that had the highest association with the MRI findings. Two separate analyses were run, the first using a Welch t-test to find the lipids with the highest abilities to separate MRI positive/negative based on the p-values and the second based on a random forest model with the same task, and the most relevant lipids selected based on their Gini index. For each of the algorithms, the top 30 lipids associated with the MRI findings were selected, and the intersect of these two results provided the final subset of lipids for further analysis.

The subset of lipids was used as predictors in penalized logistic regression models to assess their discriminatory ability. Performance was assessed in a test set following the model fit to a training set (70%-30% split) where the subset of lipids was selected from the training set. Two penalized models were selected lasso and ridge regression, and each set of the process was repeated 100 times (data split, subset selection, model fit on training set, evaluation on the testing set), and the results of the performance for each penalized model were aggregated.

The penalized models were also run on the full set of lipids to compare the performance between them and the reduced set, and to validate the filtering process. Those analyses yielded eight under the curve values, four for the MRI positivity/negativity discrimination on the full set of patients (CT positive and negative) and four for the MRI positivity/negativity discrimination for the subset of patients with negative CT.

### **Abnormalities at the individual patient level**

A separate analysis was carried on the individual patients to investigate which ones had the highest level of abnormalities defined using FA and MD. For those patients with the highest levels of abnormalities (please see below for definition) an analysis was performed to investigate whether patients who exhibited the most damage in the white matter tracts also exhibit differences in lipid concentrations either on the functional group level or the individual lipid level.

To identify which patients had the highest irregularities a comparison analysis was performed with the images of the healthy control subjects of the study. For each ROI, a linear regression model was first fit with ROI as dependent variable and sex and age (fitted as a second-degree



polynomial) as predictors. The average values and a confidence interval (1 standard deviation from the baseline) for each range was calculated for the healthy controls ROI. Then, controlled for age and sex, it was determined if a patient's ROI value was abnormal if it fell outside the baseline range. For a particular ROI, if both of the FA or MD values was outside the respective baseline range, the ROI value was designated as fully abnormal. The overall burden of injury was determined by calculating percentages of fully abnormal ROIs for each patient.

The percentage burden of injury of the patients was correlated to the 48 ROIs to see if any patterns are shown for different brain areas. For this analysis the raw concentration of the lipids within each group was added and used for a heatmap of concentration related to the burden of injury. In that plot only fully abnormal percentages are shown.

### **Abnormalities at the aggregate level**

To determine if the ROIs that were prominent in the frequency of associations to the lipids were related to the the initial TBI location, that is whether the most frequent ROIs were the ones that were most affected in the injury, an abnormality frequency analysis of the ROIs was performed. In this analysis the ROIs of the TBI patients were compared with the respective ROIs of the healthy controls that undertook the scans.

For this analysis, a two-sample Kolmogorov-Smirnov test was applied for each ROI separately for the FA and MD sets to test whether the different ROIs were different between the TBI patients and healthy controls. The p-values were corrected for multiple testing with the false discovery rate method for each set separately. The frequency of significant correlations was then extracted for each ROI and these were projected on a brain map visualization using the CARIMAS software (<https://turkupertcentre.fi/carimas/>). For comparison, the frequency of the significant correlations of the ROIs to the lipids were also projected, as well the average value of correlation of the ROIs to the lipids.

### **Network analysis**

For the construction of the partial correlation networks, a similar process as the construction of the frequency matrices was applied. In this case, the different ROIs were compared with all lipids and the lipids with the highest frequencies were found. The tables constructed in this case were 48 x 20 for the FA and MD feature sets and 51 x 20 for the volumetric set. The significant correlations between the lipids and the ROIs of the three sets were filtered out and the frequency that each lipid appears in each table was summed up. That way the lipids that correlate the most with the imaging feature sets were identified. The 40 lipids with the most correlations were then

selected (20% of the total amount of lipids). The aim of this analysis was to find the lipids to be included in the partial correlation network, while the analysis of the frequency matrices was intended to visualize the patterns of relation between the ROIs and the lipids. It can point out to the ROIs that relate the most to the lipids, while the partial correlation network can show how the lipids and the brain regions are related to each other. These two analyses complement each other and elucidate the different ways that the brain regions and the circulating lipidome connect following acute TBI.

For the partial correlation network, the library *qgraph* in R was used. The top forty lipids for each feature set were used, together with the ROIs. For the FA and MD feature sets the brain was split in 3 parts, middle, left and right and the correlations were controlled with the inclusion of time elapsed between injury and blood sample draw, time between the injury and the MR scan, propofol administration and age. For the volumetric data the brain was inputted as a whole, and the relationships were controlled for age. Only the significant partial correlations are shown on the network with an alpha level of 0.05 for all sets.

## Data availability

Data are accessible based on submission of a data access request through the CENTER-TBI website: <https://www.center-tbi.eu/data>. CENTER-TBI is committed to data sharing, and in particular to responsible further use of the data. Hereto, we have a data sharing statement in place: <https://www.center-tbi.eu/data/sharing>. The CENTER-TBI Management Committee, in collaboration with the General Assembly, established the Data Sharing policy and Publication and Authorship Guidelines to assure correct and appropriate use of the data as the dataset is hugely complex and requires help of experts from the Data Curation Team or Bio-Statistical Team for correct use. This means that we encourage researchers to contact the CENTER-TBI team for any research plans and the Data Curation Team for any help in appropriate use of the data, including sharing of scripts. The complete Manual for data access is also available online: <https://www.center-tbi.eu/files/SOP-Manual-DAPR-20181101.pdf>

## Results

In total there were 103 patients that had both an MRI scan and blood samples available for analysis. However, one patient did not have a reliable MRI designation and was excluded from the classification model. The demographics of the study population can be seen in Table 1 and study workflow is shown in Fig. 1. In both study groups, the majority were male (TBI: 75%;

control: 59%). The median age of the patients with TBI was 43 (range 18–82) years, and in healthy controls 40 years (range 21–65). The median GCS score was 15 (range 3–15) and Glasgow Outcome Scale Extended (GOSE) score 7 (range 1–8). For the baseline MRI findings there were 102 patients in the dataset that had a designation available, 62 of which were positive. For the baseline CT scan 33 were negative and a separate model only for these patients was developed (10 of 33 were MRI positive).

## **Circulating lipidome associates with neuroimage findings**

Overall, the results show that specific lipid classes are correlated with the findings of MRI scans. Particularly, FA tracts mostly correlated with PC and LPC, MD mostly with SM and PC, and volumetric data show most correlations to PC and TG, but other groups as well. These correlations can be seen in Table 2. In general, FA values have positive correlations to the lipids, whilst MD have negative (Supplementary Tables 3 and 4).

Overall, the patients with the highest proportions of abnormalities detected in the scans showed lower concentration of lipids, particularly in SM, Cer, and TG, consistent with previous findings<sup>10</sup>. Furthermore, the lipids showed a good discriminatory ability to differentiate patients who had a positive CT from those with a negative CT.

## **Classification modelling for MRI/CT discrimination**

The penalized models (eight in total) confirmed the discriminatory ability of the metabolites for both the MRI-positivity/negativity discrimination for all patients, and for the subset of patients with negative CT. The CT discriminatory ability was not examined in this context but only the subset of patients with negative CT. For all patients, the models had an AUC of 0.79–0.82, whereas for the CT negative patients, the models with the reduced sets of lipids had an AUC of 0.72, and the models with the full set of lipids had an AUC of 0.6, which is likely due to the low number of observations for this analysis (Supplementary Table 5).

## **Associations of lipids with ROIs**

The overall lipidomic profile and the frequency of their occurrence (48 ROIs for FA and MD, 51 ROIs for volumetric data) in the correlation matrices can be seen in Table 2. The top 25 lipids for each set are shown. PC and LPC are the top lipid classes for the FA set, while SM and PC are the top lipid classes for the MD set. For the volumetric dataset, the classes that were overwhelmingly represented are PC, LPC, and TG.

The ROIs with the most relationships (frequency of at least 10%) with lipids (201 total lipids) are shown in Supplementary Tables 3 , 4, and 6 as frequencies of significant correlations to the lipids. The majority of negative correlations are shown in blue and positive in red. The FA ROIs with the highest frequency of correlations to lipids are the corona radiata and the cerebellar peduncle. FA values are reduced in the TBI patients with TBI compared to the controls.

For the MD set, the corticospinal and the superior longitudinal fasciculus are the areas with the highest frequencies (Supplementary Table 3). All ROIs have negative correlations with the lipids, which means that the lipid values and the MD set values move in the opposite direction i.e. the lipid reduce and the MD values increase. For the volumetric data the ROIs overall show mixed correlations to the lipids.

Furthermore, for each ROI the values of the significant correlations were plotted as a beanplot. The correlations for the FA and the MD sets can be seen in Fig. 2. For the FA set, the correlations between ROIs and lipids are mostly positive, and for the MD set it is predominantly negative correlations, as it is for the volumetric dataset in Supplementary Fig. 3, as also shown in Supplementary Tables 3 , 4, and 6.

The heatmap that shows the lipid values related to the burden of injury (percentages of partially and fully abnormal ROIs) is shown in Fig. 3.

## **Brain maps and correlation networks of white matter tracts**

In Fig. 4A, FA ROIs are mapped into the JHU brain atlas. This visualization shows the number of the abnormalities that each ROI showed in the aggregate data, the number of lipids that correlate significantly with that ROI, and the average value of these correlations. In the second row, the correlation of the lipids to the burden of injury is plotted to check if similar patterns can be seen and if the high correlations of lipids to ROIs is related to the burden of injury. Fig. 4B shows the same but for the MD set. Overall, no patterns can be seen in either figure with respect to the lipids and the frequency of abnormalities. For FA, the lipids have a positive association with the ROIs and for MD, the lipids have a negative association with the ROIs.

The top 40 lipids that correlated with the FA set were grouped into their lipid classes, and the results are shown in Fig. 5A. PC, LPC, SM, and TG classes all show strong correlations to the different white matter tracts. For the MD set the most strongly related classes of lipids are PC and SM (Fig. 5B). Lipid levels do not seem to be affected by the time elapsed between injury and blood sample collection nor the time of scans, when controlled for in the networks.

## Discussion

In this study, we have shown that there are distinct directions of associations between the neuroimaging data (FA and MD sets) and the concentrations of circulating lipids. As expected, the FA and MD values correlated with the severity of TBI (higher MD values, lower FA)<sup>32</sup>. We also observed that the lipid associations to FA and MD show different metabolic signatures. LPCs associate mostly with FA while SMs associate with MD. Only PCs have strong associations with both as well as with the volumetric data.

FA has been shown to be sensitive to the changes in the microstructure of the brain<sup>33</sup>. However, connecting FA changes to specific brain microstructure changes is challenging due to the biologically unspecific nature of FA<sup>34</sup>. The primary associations with FA in our data were found with LPCs. We found previously that decreased serum LPC concentrations associated with more severe disease and poorer outcomes in TBI<sup>10</sup>. In animal models of TBI, LPC has been identified as one of the key lipid class that increased in the CNS following the injury<sup>35</sup> and correlated with the presence of MCP-1 in the hippocampus<sup>36</sup> – a key protein in attracting immune cells to the brain. However, none of these studies measured the LPCs concentrations in the blood. There are known transporters of LPCs in the CNS<sup>37</sup> and decreased levels of circulating LPC have been associated with poor outcomes in other CNS diseases<sup>38</sup>. LPCs are also implicated in a wide range of inflammatory diseases<sup>39</sup>. Given these previous findings, the positive associations of LPCs with FA as observed in our study may reflect an increased inflammatory drive associating with changes in brain microstructure following a TBI.

SM is a key lipid class needed for the synthesis of myelin in the CNS<sup>40</sup>. Decreased serum levels of SMs following a TBI and inverse associations with MD changes suggest that SMs are recruited for myelin repair following the membrane damage in TBI. Similar inverse relationship between SMs levels and MD has been observed in Alzheimer's disease<sup>41</sup>. SMs are also converted to ceramide in inflammatory conditions, which could be another non-exclusive cause for reduced levels of circulating SMs.

The lipids, which were consistently associated both with the diffusion imaging and the volumetric data were PCs. PCs are a key component of cellular membranes and therefore changes in brain microstructure will disrupt PC metabolism<sup>42</sup>. PCs can also be broken down into free fatty acids, which can be utilized as an energy source in the CNS. Other acute brain injuries have been shown to increase activity of enzymes involved in fatty acid metabolism immediately following the injury<sup>43</sup>. We have earlier shown that medium-chain fatty acids are

associated with severity of TBI<sup>9,10</sup>. It is known that TBI causes an energy crisis within the CNS<sup>44</sup> and therefore the increased utilization of PCs could be related to the severity of the energy crisis that is reflected in the poor imaging metrics.

The association with quantitative white matter imaging metrics and PCs was global as can be seen in Fig. 3. This global distribution of association is seen to a lesser extent with the TGs. In contrast, the ceramide associations seem to form two main clusters; one of more central fibres with the strongest associations and the other of the longer tracts with lower association. CEs and PCs associations were also stronger with these longer white tracts, while SMs were associated with more central tracts. The pathophysiology of what is leading to these different predilections for different types and regions of white matter is likely to be complex. An increase in ceramide in the plasma has been associated with several inflammatory and other neurodegenerative diseases including multiple sclerosis<sup>45</sup> and Alzheimer's disease<sup>46</sup>. The different roles CEs and ceramides play in energy balance may influence different patterns seen<sup>47</sup>.

The observed lack of lipid associations with specific brain volume regions in the gray matter suggests that changes in the levels of circulating lipids do not reflect the primary cortical injury in TBI. However, the consistent associations with volumetric data from deeper white matter structures suggest that the lipid changes reflect this deeper injury type. This could result from the secondary brain injury driven by axonal damage occurring in these structures. However, these findings are in line with our previous work, where we could see clear associations between polar metabolites and deeper brain volume changes<sup>48</sup>. This suggests that the patterns of associations between the volumes and metabolites regardless of type is more clear in the deeper brain regions.

## **Limitations**

This is the largest study to date combining serum metabolomics and MRI imaging including the diffusion-weighted imaging. However, the sample size is still small and further validation studies are required to support our findings. The underlying reasons for the lipid changes observed are also difficult to pinpoint due to the difficulty in obtaining tissue or fluid samples from within the CNS, and therefore studies in suitable experimental models would be needed in order to understand the causes of the observed lipid changes.

## **Conclusions**

We have identified groups of lipids which associate with specific MRI imaging metrics following TBI. There appears to be consistent patterns of lipid changes associating with the specific microstructure changes in the CNS white matter. There is also a pattern of lipids with regional specificity, suggesting that blood-based lipidomics may provide an insight into the underlying disease mechanisms in TBI.

## **Acknowledgements**

The authors thank Daniel Duberg, Lisanna Sinisalu, and Vanja Stefanović for technical assistance in metabolomics analysis.

## **Funding**

CENTER-TBI was supported by the European Union 7th Framework program (grant no. 602150), with additional project support from OneMind (US), the Hannelore Kohl Foundation (DE), NeuroTrauma Sciences (US), and Integra Neurosciences. The metabolomics study was supported by a grant from Swedish Research Council to M.O. (grant no. 2018-02629). V.F.J.N. was supported by a National Institute for Health and Care Research (NIHR) Advanced Fellowship and by an Academy of Medical Sciences / The Health Foundation Clinician Scientist Fellowship. The study was also supported by funding from the Academy of Finland to J.P.P. (grant no. 17379) and a grant from Maire Taponen Foundation to J.P.P. The funders had no role in study design, data collection and analysis, decision to publish, or preparation of the manuscript. S.R. was supported by a Wellcome Trust PhD Fellowship (grant no. 222213/Z/20/Z)

## **Competing interests**

The authors report no competing interests.

## **Supplementary material**

Supplementary Tables 1-6

Supplementary Figure 1

## References

1. Maas AIR, Menon DK, Adelson PD, *et al.* Traumatic brain injury: integrated approaches to improve prevention, clinical care, and research. *Lancet Neurol.* Dec 2017;16(12):987-1048. doi:10.1016/S1474-4422(17)30371-X
2. Maas AIR, Menon DK, Manley GT, *et al.* Traumatic brain injury: progress and challenges in prevention, clinical care, and research. *Lancet Neurol.* Nov 2022;21(11):1004-1060. doi:10.1016/S1474-4422(22)00309-X
3. Maas AI. Prefactory comments: promise and enigma of biomarkers for brain injury. *Front Neurol.* 2012;3:173. doi:10.3389/fneur.2012.00173
4. Launey Y, Fryer TD, Hong YT, *et al.* Spatial and temporal pattern of ischemia and abnormal vascular function following traumatic brain injury. *JAMA neurology.* 2020;77(3):339-349.
5. Hermanides J, Hong YT, Trivedi M, *et al.* Metabolic derangements are associated with impaired glucose delivery following traumatic brain injury. *Brain.* 2021;144(11):3492-3504.
6. Joyce JM, La PL, Walker R, Harris AD. Magnetic Resonance Spectroscopy of Traumatic Brain Injury and Subconcussive Hits: A Systematic Review and Meta-Analysis. *Journal of Neurotrauma.* 2022;
7. Carpenter KL, Jalloh I, Gallagher CN, *et al.* 13C-labelled microdialysis studies of cerebral metabolism in TBI patients. *European Journal of Pharmaceutical Sciences.* 2014;57:87-97.
8. Dickens AM, Posti JP, Takala RSK, *et al.* Serum Metabolites Associated with Computed Tomography Findings after Traumatic Brain Injury. *J Neurotrauma.* Nov 15 2018;35(22):2673-2683. doi:10.1089/neu.2017.5272
9. Orešič M, Posti JP, Kamstrup-Nielsen MH, *et al.* Human serum metabolites associate with severity and patient outcomes in traumatic brain injury. *EBioMedicine.* 2016;12:118-126.



10. Thomas I, Dickens AM, Posti JP, *et al.* Serum metabolome associated with severity of acute traumatic brain injury. *Nat Commun.* May 10 2022;13(1):2545. doi:10.1038/s41467-022-30227-5
11. Hill CS, Coleman MP, Menon DK. Traumatic axonal injury: mechanisms and translational opportunities. *Trends in neurosciences.* 2016;39(5):311-324.
12. Yuh EL, Cooper SR, Mukherjee P, *et al.* Diffusion tensor imaging for outcome prediction in mild traumatic brain injury: a TRACK-TBI study. *J Neurotrauma.* Sep 1 2014;31(17):1457-77. doi:10.1089/neu.2013.3171
13. Richter S, Winzeck S, Kornaropoulos EN, *et al.* Neuroanatomical Substrates and Symptoms Associated With Magnetic Resonance Imaging of Patients With Mild Traumatic Brain Injury. *JAMA Netw Open.* Mar 1 2021;4(3):e210994. doi:10.1001/jamanetworkopen.2021.0994
14. Newcombe V, Chatfield D, Outtrim J, *et al.* Mapping traumatic axonal injury using diffusion tensor imaging: correlations with functional outcome. *PLoS One.* May 4 2011;6(5):e19214. doi:10.1371/journal.pone.0019214
15. Newcombe VF, Correia MM, Ledig C, *et al.* Dynamic Changes in White Matter Abnormalities Correlate With Late Improvement and Deterioration Following TBI: A Diffusion Tensor Imaging Study. *Neurorehabil Neural Repair.* Jan 2016;30(1):49-62. doi:10.1177/1545968315584004
16. Azizkhanian I, Sheth SA, Iavarone AT, Lee S, Kakarla V, Hinman JD. Plasma Lipid Profiling Identifies Biomarkers of Cerebral Microvascular Disease. *Front Neurol.* 2019;10:950. doi:10.3389/fneur.2019.00950
17. Steyerberg EW, Wiegers E, Sewalt C, *et al.* Case-mix, care pathways, and outcomes in patients with traumatic brain injury in CENTER-TBI: a European prospective, multicentre, longitudinal, cohort study. *The Lancet Neurology.* 2019;18(10):923-934. doi:10.1016/s1474-4422(19)30232-7
18. Czeiter E, Amrein K, Gravesteijn BY, *et al.* Blood biomarkers on admission in acute traumatic brain injury: Relations to severity, CT findings and care path in the CENTER-TBI study. *EBioMedicine.* Jun 2020;56:102785. doi:10.1016/j.ebiom.2020.102785

19. Folch J, Lees M, Sloane Stanley GH. A simple method for the isolation and purification of total lipides from animal tissues. *The Journal of biological chemistry*. May 1957;226(1):497-509.
20. CENTER-TBI. MRI Study Protocols. Accessed 11 Jan, 2022.  
<https://www.center-tbi.eu/project/mri-study-protocols>
21. Haacke EM, Duhaime AC, Gean AD, *et al.* Common data elements in radiologic imaging of traumatic brain injury. *Journal of Magnetic Resonance Imaging*. 2010;32(3):516-543.
22. Vande Vyvere T, Wilms G, Claes L, *et al.* Central versus local radiological reading of acute computed tomography characteristics in multi-center traumatic brain injury research. *Journal of Neurotrauma*. 2019;36(7):1080-1092.
23. Winzeck S. Methods for Data Management in Multi-Centre MRI Studies and Applications to Traumatic Brain Injury. University of Cambridge; 2021.
24. Manjon JV, Coupe P, Concha L, Buades A, Collins DL, Robles M. Diffusion weighted image denoising using overcomplete local PCA. *PLoS One*. 2013;8(9):e73021. doi:10.1371/journal.pone.0073021
25. Veraart J, Novikov DS, Christiaens D, Ades-Aron B, Sijbers J, Fieremans E. Denoising of diffusion MRI using random matrix theory. *Neuroimage*. Nov 15 2016;142:394-406. doi:10.1016/j.neuroimage.2016.08.016
26. Veraart J, Fieremans E, Jelescu IO, Knoll F, Novikov DS. Gibbs ringing in diffusion MRI. *Magn Reson Med*. Jul 2016;76(1):301-14. doi:10.1002/mrm.25866
27. Jeurissen B, Tournier JD, Dhollander T, Connelly A, Sijbers J. Multi-tissue constrained spherical deconvolution for improved analysis of multi-shell diffusion MRI data. *Neuroimage*. Dec 2014;103:411-426. doi:10.1016/j.neuroimage.2014.07.061
28. Andersson JLR, Sotiropoulos SN. An integrated approach to correction for off-resonance effects and subject movement in diffusion MR imaging. *Neuroimage*. Jan 15 2016;125:1063-1078. doi:10.1016/j.neuroimage.2015.10.019

29. Mori S, Oishi K, Jiang H, *et al.* Stereotaxic white matter atlas based on diffusion tensor imaging in an ICBM template. *Neuroimage*. Apr 1 2008;40(2):570-582.  
doi:10.1016/j.neuroimage.2007.12.035
30. Fortin J-P, Cullen N, Sheline YI, *et al.* Harmonization of cortical thickness measurements across scanners and sites. *NeuroImage*. 2018-02-01 2018;167:104-120.  
doi:10.1016/j.neuroimage.2017.11.024
31. Fortin J-P, Parker D, Tunç B, *et al.* Harmonization of multi-site diffusion tensor imaging data. *NeuroImage*. 2017-11-01 2017;161:149-170.  
doi:10.1016/j.neuroimage.2017.08.047
32. Douglas DB, Iv M, Douglas PK, *et al.* Diffusion Tensor Imaging of TBI: Potentials and Challenges. *Top Magn Reson Imaging*. Oct 2015;24(5):241-51.  
doi:10.1097/RMR.0000000000000062
33. Alexander AL, Lee JE, Lazar M, Field AS. Diffusion tensor imaging of the brain. *Neurotherapeutics*. Jul 2007;4(3):316-29. doi:10.1016/j.nurt.2007.05.011
34. Sharma S, Laule C, Moore GRW, Li DKB, Zhang Y. Correlating new directional measures of myelin and axonal integrity in T2-weighted MRI with quantitative histology in multiple sclerosis. *J Neurosci Methods*. Jan 1 2019;311:369-376.  
doi:10.1016/j.jneumeth.2018.09.020
35. Tzekov R, Dawson C, Orlando M, *et al.* Sub-Chronic Neuropathological and Biochemical Changes in Mouse Visual System after Repetitive Mild Traumatic Brain Injury. *PLoS One*. 2016;11(4):e0153608. doi:10.1371/journal.pone.0153608
36. Palafox-Sanchez V, Ying Z, Royes LFF, Gomez-Pinilla F. The interaction between brain and liver regulates lipid metabolism in the TBI pathology. *Biochim Biophys Acta Mol Basis Dis*. Apr 1 2021;1867(4):166078. doi:10.1016/j.bbadis.2021.166078
37. Semba RD. Perspective: The Potential Role of Circulating Lysophosphatidylcholine in Neuroprotection against Alzheimer Disease. *Adv Nutr*. Jul 1 2020;11(4):760-772. doi:10.1093/advances/nmaa024

38. Mapstone M, Cheema AK, Fiandaca MS, *et al.* Plasma phospholipids identify antecedent memory impairment in older adults. *Nat Med.* Apr 2014;20(4):415-8.  
doi:10.1038/nm.3466
39. Knuplez E, Marsche G. An Updated Review of Pro- and Anti-Inflammatory Properties of Plasma Lysophosphatidylcholines in the Vascular System. *Int J Mol Sci.* Jun 24 2020;21(12)doi:10.3390/ijms21124501
40. Schneider N, Hauser J, Oliveira M, *et al.* Sphingomyelin in Brain and Cognitive Development: Preliminary Data. *eNeuro.* Jul/Aug 2019;6(4)doi:10.1523/ENEURO.0421-18.2019
41. Gonzalez CE, Venkatraman VK, An Y, *et al.* Peripheral sphingolipids are associated with variation in white matter microstructure in older adults. *Neurobiol Aging.* Jul 2016;43:156-63. doi:10.1016/j.neurobiolaging.2016.04.008
42. Hachem M, Nacir H. Emerging Role of Phospholipids and Lysophospholipids for Improving Brain Docosahexaenoic Acid as Potential Preventive and Therapeutic Strategies for Neurological Diseases. *Int J Mol Sci.* Apr 2 2022;23(7)doi:10.3390/ijms23073969
43. Adibhatla RM, Hatcher JF. Role of Lipids in Brain Injury and Diseases. *Future Lipidol.* Aug 2007;2(4):403-422. doi:10.2217/17460875.2.4.403
44. Menon DK, Coles JP, Gupta AK, *et al.* Diffusion limited oxygen delivery following head injury. *Crit Care Med.* Jun 2004;32(6):1384-90.  
doi:10.1097/01.ccm.0000127777.16609.08
45. Filippatou AG, Moniruzzaman M, Sotirchos ES, *et al.* Serum ceramide levels are altered in multiple sclerosis. *Multiple Sclerosis Journal.* 2021;27(10):1506-1519.
46. Filippov V, Song MA, Zhang K, *et al.* Increased ceramide in brains with Alzheimer's and other neurodegenerative diseases. *Journal of Alzheimer's Disease.* 2012;29(3):537-547.

47. Cruciani-Guglielmacci C, Lopez M, Campana M, le Stunff H. Brain Ceramide Metabolism in the Control of Energy Balance. *Front Physiol.* 2017;8:787.  
doi:10.3389/fphys.2017.00787

48. Thomas I, Dickens AM, Posti JP, *et al.* Integrative Analysis of Circulating Metabolite Profiles and Magnetic Resonance Imaging Metrics in Patients with Traumatic Brain Injury. *Int J Mol Sci.* Feb 19 2020;21(4)doi:10.3390/ijms21041395

**Table 1.** Patient and control demographic characteristics.

|                                       | TBI patients                                  | Healthy controls    |
|---------------------------------------|-----------------------------------------------|---------------------|
| Number of subjects                    | 103                                           | 104                 |
| Age (interquartile range)             | 43 (28.5-58)                                  | 39.5 (28.5-58)      |
| Sex                                   | 77M/26F                                       | 61M/42F (1 missing) |
| Baseline GCS (interquartile range)    | 15 (10.75-15)                                 | -                   |
|                                       | 68.9 % mild                                   |                     |
|                                       | 6.8 % moderate                                |                     |
|                                       | 21.4 % severe                                 |                     |
| Stratum                               | 33 admission (32 mild, 1 moderate)            |                     |
|                                       | 28 ER (27 mild, 1 NA)                         |                     |
|                                       | 42 ICU (23 mild, 6 moderate, 22 severe, 2 NA) |                     |
| GOSE (interquartile range)            | 7 (6-8)                                       | -                   |
| Time of imaging (interquartile range) | 2 (1-16)                                      | -                   |
| MRI                                   | 62 positive/40 negative, 1 NA                 | -                   |
| CT                                    | 54 positive/45 negative, 4 NA                 | -                   |

F, female; M, male; GCS, Glasgow Coma Score; GOSe, Glasgow Outcome Score extended; Median values are shown for the characteristics. Three stratum were present based on treatment intensity: admission to hospital, emergency room (ER visit), admission to intensive care unit (ICU).

**Table 2.** Lipids that have the largest relative frequencies (number of correlations divided by the number of ROIs) of significant correlation to the feature sets.

| Associations with FA |       | Association with MD |       | Associations with volume |       |
|----------------------|-------|---------------------|-------|--------------------------|-------|
| Lipid                | Freq  | Lipid               | Freq  | Lipid                    | Freq  |
| LPC(20:4)            | 0.458 | PC(O-36:4)          | 0.354 | PC(36:4)                 | 0.431 |
| LPC(16:0)            | 0.438 | PC(O-38:4)          | 0.354 | TG(16:0/18:2/18:2)       | 0.431 |
| LPC(20:5)            | 0.396 | SM(d18:2/18:1)      | 0.333 | TG(54:6)                 | 0.373 |
| LPC(16:0e)           | 0.375 | PC(O-22:1/20:4)     | 0.333 | CE fragment              | 0.353 |
| LPC(18:1)            | 0.375 | PC(34:3)            | 0.333 | PC(O-38:6)               | 0.294 |
| PC(34:3)             | 0.333 | PC(O-38:5)          | 0.292 | TG(18:2/22:5/16:0)       | 0.216 |
| PC(35:1)             | 0.292 | SM(d18:1/22:1)      | 0.271 | PC(O-40:6)               | 0.196 |
| PC(O-36:4)           | 0.292 | SM(d41:2)           | 0.271 | TG(54:6)                 | 0.196 |
| PC(O-38:5)           | 0.292 | PC(O-40:6)          | 0.229 | PC(33:0)                 | 0.176 |
| PC(O-40:6)           | 0.292 | TG (48:4)           | 0.229 | SM(d18:1/24:0)           | 0.176 |
| LPC(18:2)            | 0.271 | PC(P-18:0/18:1)     | 0.208 | LPC(16:0)                | 0.157 |
| PC(O-36:3)           | 0.25  | PC(O-40:5)          | 0.188 | LPC(16:0e)               | 0.157 |
| PC(18:0)             | 0.25  | SM(d18:1/18:1)      | 0.188 | SM(d18:1/22:1)           | 0.157 |
| PC(36:4)             | 0.208 | PC(35:4)            | 0.188 | LPC(18:0)                | 0.137 |
| PC(40:8)             | 0.208 | SM(d16:1/23:0)      | 0.188 | LPC(20:5)                | 0.137 |
| PC(O-38:4)           | 0.208 | SM(d41:1)           | 0.167 | PC(38:1)                 | 0.137 |
| SM(d36:2)            | 0.188 | TG(58:10)           | 0.146 | PC(O-40:5)               | 0.137 |
| TG (48:4)            | 0.167 | PC(36:4)            | 0.146 | PC(O-40:6)               | 0.137 |
| PC(35:4)             | 0.146 | SM(d40:1)           | 0.146 | PC(P-18:0/22:6)          | 0.118 |
| PC(37:4)             | 0.146 | PC(34:2)            | 0.146 | SM(d18:1/24:2)           | 0.118 |
| LPC(14:0)            | 0.146 | PC(O-36:3)          | 0.146 | LPC(22:6)                | 0.098 |

|                 |       |                |       |                    |       |
|-----------------|-------|----------------|-------|--------------------|-------|
| LPC(22:6)       | 0.146 | SM(d18:1/24:0) | 0.146 | TG (48:4)          | 0.098 |
| PC(O-34:2)      | 0.146 | SM(d38:2)      | 0.146 | LacCer(d18:1/16:0) | 0.078 |
| PC(O-40:5)      | 0.146 | LPC(14:0)      | 0.125 | LPC(18:1)          | 0.078 |
| PC(P-18:0/18:2) | 0.146 | PC(35:1)       | 0.125 | LPC(18:2)          | 0.078 |



**Figure 1. Flowchart of data acquisition and analysis.** The final analysis included 103 patients that fulfilled the inclusion criteria, and the classification models included 102.

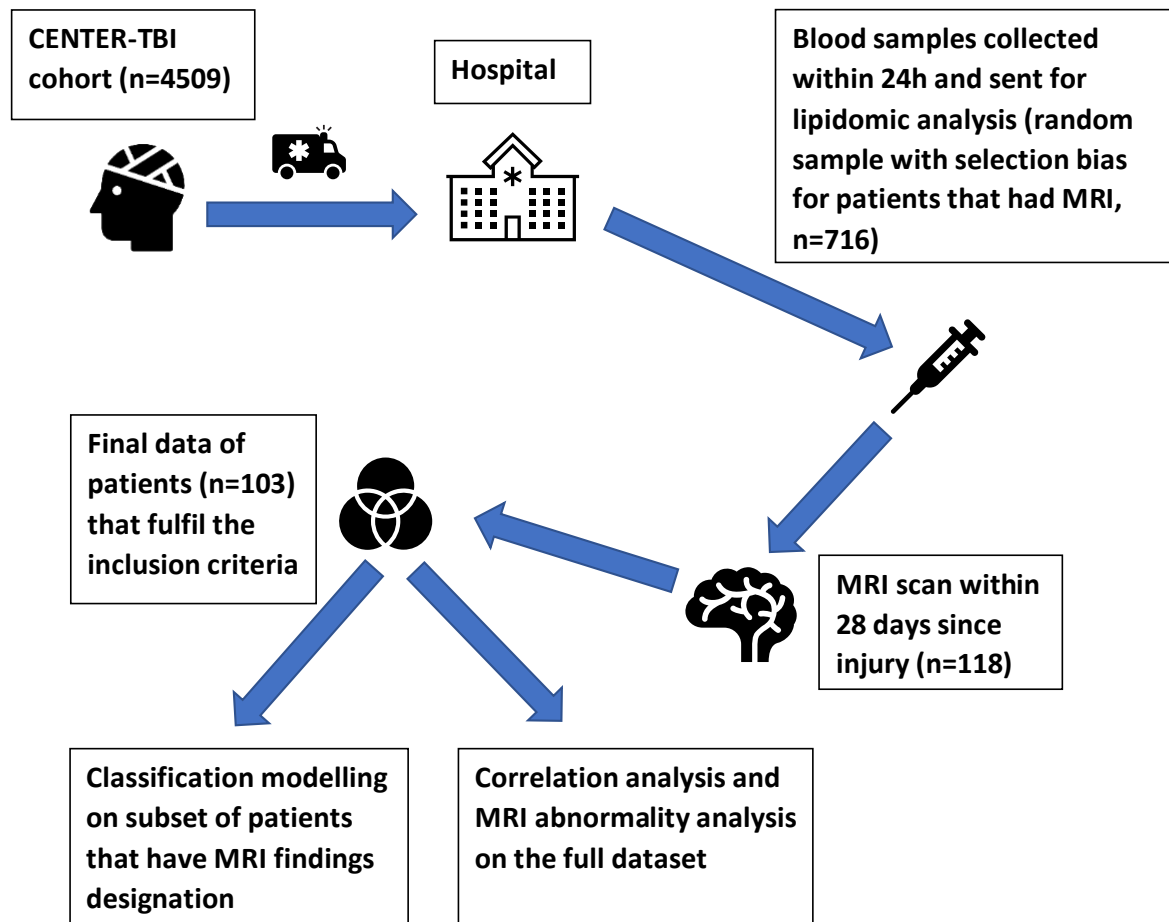

**Figure 2. Correlations of the white matter tracts to individual lipid concentrations.** The beanpots show that the fractional anisotropy (FA) set (left) has mostly positive correlations, on average at about 0.2, while the mean diffusivity (MD) set (right) has mostly negative correlations.

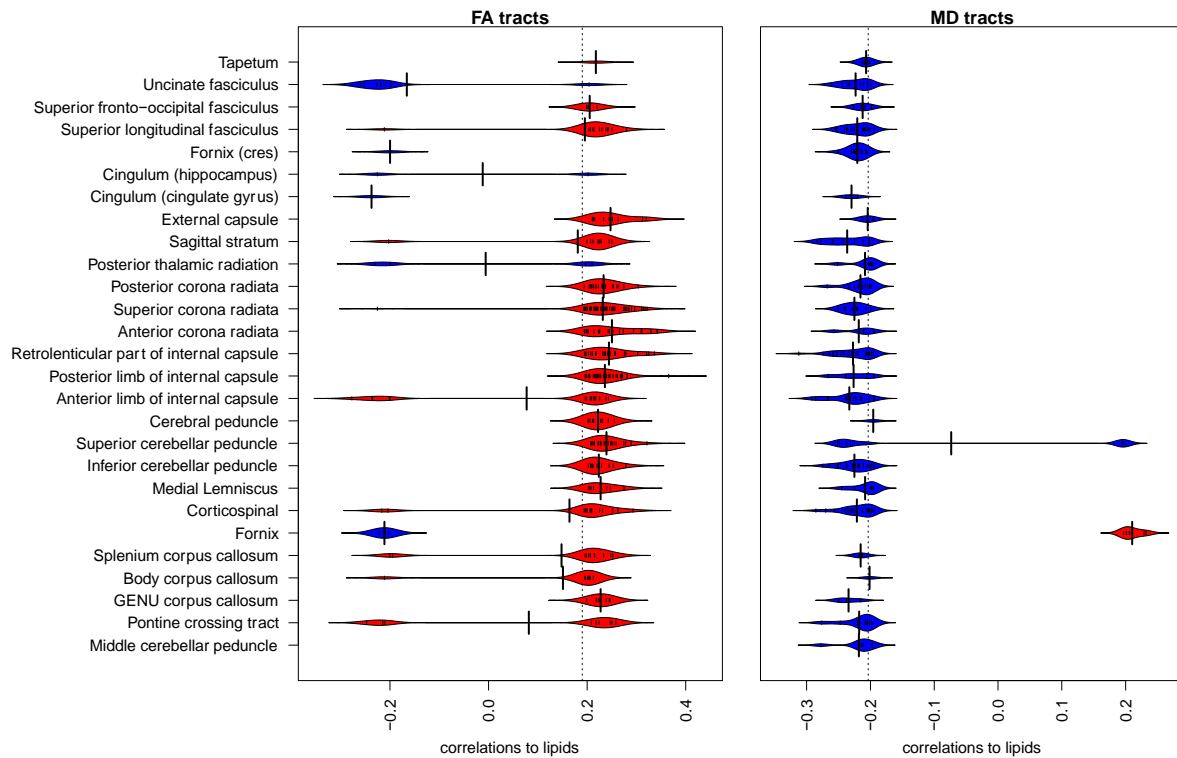

**Figure 3. Relation of the main lipid groups to the burden of injury.** The burden of injury was a summary matrix of FA and MD abnormalities, to assess the deviance from control values. The lipid group values are unadjusted summed concentrations of the lipids within each group. L, left; R, right.

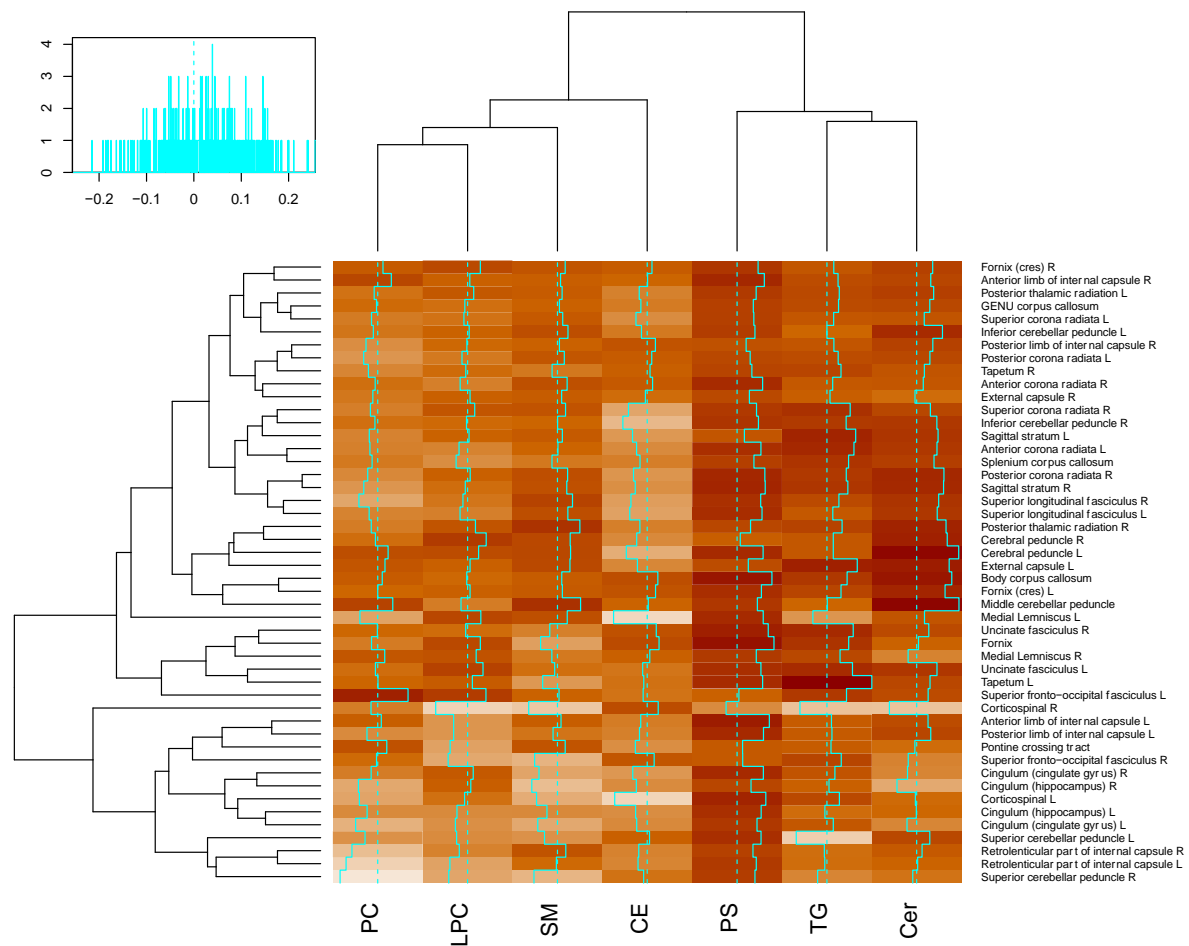

**Figure 4. Brain maps of lipid correlations and burden of injury.** On the top row of each subplot, the values of significant correlations to each brain region are shown. On the bottom row, the burden of injury for each region is shown as frequency of abnormalities per region. No visible pattern between the top and bottom rows can be seen. **(A)** FA of the white matter tracts. The correlations on top range from -0.27 (deep blue) to 0.24 (bright red) and the frequencies on bottom from 0 (black) to 37 (bright red). **(B)** MD of the white matter tracts. The correlations on top range from -0.23 (deep blue) to 0.26 (bright red) and the frequencies on bottom from 0 (black) to 54 (bright red).

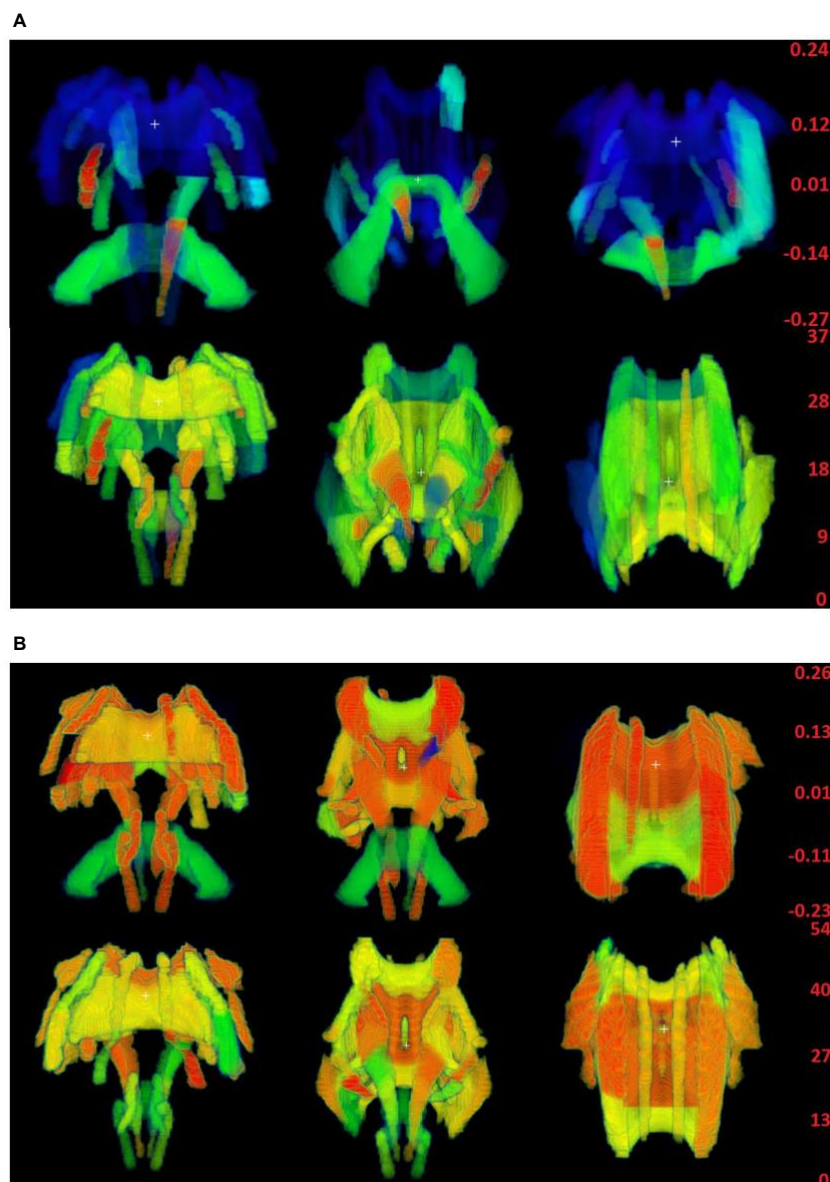

**Figure 5. Partial correlation networks.** These networks display the individual lipid correlations to other lipids, the white matter tracts, time from injury, time from scan, age, and propofol administration. The 40 lipids with the highest number of significant correlations are shown. **(A)** FA of the white matter tracts. **(B)** MD of the white matter tracts.

Abbreviations: CE, cholesterol ester; Cer, ceramide;LPC, lysophosphatidylcholine; PC, phosphatidylcholine; PS, phosphatidylserine; SM, sphingomyelin; TG, triacylglycerol; FA, fractional anisotropy measures; MD, mean diffusivity.

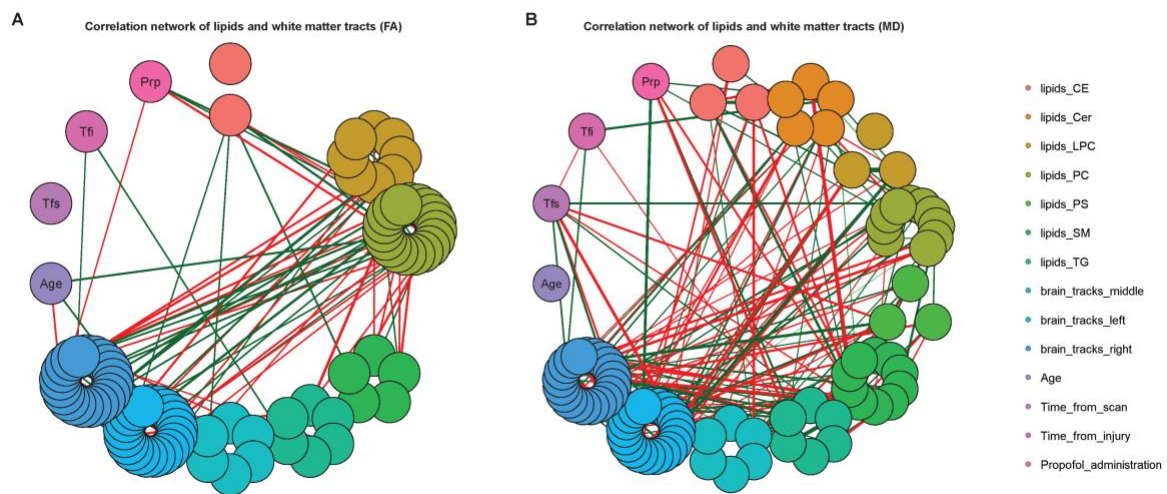

Source: https://medrxiv.org/content/10.1101/2023.03.14.23287262v1.full.pdf
