# Supplementary material for: Serum lipidome associates with neuroimaging features in patients with traumatic brain injury
Source: bioRxiv or medRxiv preprint supplement (doi:10.1101/2023.03.14.23287262), 2023-03-20

# **Serum lipidome associates with neuroimaging features in patients with traumatic brain injury**

Ilias Thomas et al.

## **Supplementary Material**

**Supplementary Table 1.** The volumetric data ROIs as segmented into 51 regions.

| <b>ROI Index</b> | <b>Collapsed ROI name</b> |
|------------------|---------------------------|
| 1                | BrainStem                 |
| 2                | CerebellarVermis          |
| 3                | LeftAcumbens              |
| 4                | LeftAmygdala              |
| 5                | LeftBasalForebrain        |
| 6                | LeftCaudate               |
| 7                | LeftCerebellarWhite       |
| 8                | LeftCerebellumGrey        |
| 9                | LeftCerebralWhiteMatter   |
| 10               | LeftDorsolateralFrontal   |
| 11               | LeftFrontalPole           |
| 12               | LeftFusiformGyrus         |
| 13               | LeftHippocampalComplex    |
| 14               | LeftInsula                |
| 15               | LeftLateralParietalLobe   |
| 16               | LeftMedialFrontal         |
| 17               | LeftMedialParietalLobe    |
| 18               | LeftOccipitalLobe         |
| 19               | LeftOrbitofrontal         |
| 20               | LeftPallidum              |
| 21               | LeftPrecentral            |
| 22               | LeftPutamen               |
| 23               | LeftSubcallosal           |
| 24               | LeftTemporalLobe          |
| 25               | LeftTemporalPole          |
| 26               | LeftThalamus              |
| 27               | RightAcumbens             |
| 28               | RightAmygdala             |
| 29               | RightBasalForebrain       |
| 30               | RightCaudate              |
| 31               | RightCerebellarWhite      |
| 32               | RightCerebellumGrey       |

|    |                          |
|----|--------------------------|
| 33 | RightCerebralWhiteMatter |
| 34 | RightDorsolateralFrontal |
| 35 | RightFrontalPole         |
| 36 | RightFusiformGyrus       |
| 37 | RightHippocampalComplex  |
| 38 | RightInsula              |
| 39 | RightLateralParietalLobe |
| 40 | RightMedialFrontal       |
| 41 | RightMedialParietalLobe  |
| 42 | RightOccipitalLobe       |
| 43 | RightOrbitofrontal       |
| 44 | RightPallidum            |
| 45 | RightPrecentral          |
| 46 | RightPutamen             |
| 47 | RightSubcallosal         |
| 48 | RightTemporalLobe        |
| 49 | RightTemporalPole        |
| 50 | RightThalamus            |
| 51 | Ventricle                |

**Supplementary Table 2.** The white matter track data as segmented into 48 regions ROIs.

| <b>ROI index</b> | <b>FA and MD ROIs</b>                                                                                  |
|------------------|--------------------------------------------------------------------------------------------------------|
| 1                | Middle cerebellar peduncle                                                                             |
| 2                | Pontine crossing tract (a part of MCP)                                                                 |
| 3                | Genu of corpus callosum                                                                                |
| 4                | Body of corpus callosum                                                                                |
| 5                | Splenium of corpus callosum                                                                            |
| 6                | Fornix (column and body of fornix)                                                                     |
| 7                | Corticospinal tract R                                                                                  |
| 8                | Corticospinal tract L                                                                                  |
| 9                | Medial lemniscus R                                                                                     |
| 10               | Medial lemniscus L                                                                                     |
| 11               | Inferior cerebellar peduncle R                                                                         |
| 12               | Inferior cerebellar peduncle L                                                                         |
| 13               | Superior cerebellar peduncle R                                                                         |
| 14               | Superior cerebellar peduncle L                                                                         |
| 15               | Cerebral peduncle R                                                                                    |
| 16               | Cerebral peduncle L                                                                                    |
| 17               | Anterior limb of internal capsule R                                                                    |
| 18               | Inferior cerebellar peduncle L                                                                         |
| 19               | Posterior limb of internal capsule R                                                                   |
| 20               | Posterior limb of internal capsule L                                                                   |
| 21               | Retrolenticular part of internal capsule R                                                             |
| 22               | Retrolenticular part of internal capsule L                                                             |
| 23               | Anterior corona radiata R                                                                              |
| 24               | Anterior corona radiata L                                                                              |
| 25               | Superior corona radiata R                                                                              |
| 26               | Superior corona radiata L                                                                              |
| 27               | Posterior corona radiata R                                                                             |
| 28               | Posterior corona radiata L                                                                             |
| 29               | Posterior thalamic radiation (include optic radiation) R                                               |
| 30               | Posterior thalamic radiation (include optic radiation) L                                               |
| 31               | Sagittal stratum (include inferior longitudinal fasciculus and inferior fronto-occipital fasciculus) R |

|    |                                                                                                        |
|----|--------------------------------------------------------------------------------------------------------|
| 32 | Sagittal stratum (include inferior longitudinal fasciculus and inferior fronto-occipital fasciculus) L |
| 33 | External capsule R                                                                                     |
| 34 | External capsule L                                                                                     |
| 35 | Cingulum (cingulate gyrus) R                                                                           |
| 36 | Cingulum (cingulate gyrus) L                                                                           |
| 37 | Cingulum (hippocampus) R                                                                               |
| 38 | Cingulum (hippocampus) L                                                                               |
| 39 | Fornix (cres) / Stria terminalis (can not be resolved with current resolution) R                       |
| 40 | Fornix (cres) / Stria terminalis (can not be resolved with current resolution) L                       |
| 41 | Superior longitudinal fasciculus R                                                                     |
| 42 | Superior longitudinal fasciculus L                                                                     |
| 43 | Superior fronto-occipital fasciculus (could be a part of anterior internal capsule) R                  |
| 44 | Superior fronto-occipital fasciculus (could be a part of anterior internal capsule) L                  |
| 45 | Uncinate fasciculus R                                                                                  |
| 46 | Uncinate fasciculus L                                                                                  |
| 47 | Tapetum R                                                                                              |
| 48 | Tapetum L                                                                                              |

**Supplementary Table 3.** The FA ROIs that show the most correlations to the lipids together with the frequencies and the sign of the average correlations.

| Frequency | Sign of correlation | Name                                       |
|-----------|---------------------|--------------------------------------------|
| 0.323     | + (positive)        | Superior corona radiata L                  |
| 0.209     | + (positive)        | Superior cerebellar peduncle R             |
| 0.204     | + (positive)        | Medial Lemniscus L                         |
| 0.194     | + (positive)        | Corticospinal L                            |
| 0.184     | + (positive)        | Superior longitudinal fasciculus L         |
| 0.159     | + (positive)        | Posterior limb of internal capsule L       |
| 0.159     | + (positive)        | Superior corona radiata R                  |
| 0.154     | + (positive)        | Retrolenticular part of internal capsule R |
| 0.149     | + (positive)        | Cerebral peduncle L                        |
| 0.139     | + (positive)        | Posterior limb of internal capsule R       |
| 0.124     | + (positive)        | Inferior cerebellar peduncle L             |
| 0.124     | + (positive)        | Posterior corona radiata L                 |
| 0.114     | + (positive)        | Anterior corona radiata L                  |

**Supplementary Table 4.** The MD ROIs that show the most correlations to the lipids together with the frequencies and the sign of the average correlations.

| Frequency | Sign of correlation | Name                                      |
|-----------|---------------------|-------------------------------------------|
| 0.184     | - (negative)        | Corticospinal L                           |
| 0.154     | - (negative)        | Fornix (cres) L                           |
| 0.119     | - (negative)        | Superior longitudinal fasciculus L        |
| 0.1       | - (negative)        | Retrolemniscal part of internal capsule R |

**Supplementary Table 5.** Findings of the MRI classification performance of the lipids. The results of the ridge reduced model are shown.

|                                            | (1/0/NA)  | AUC (CI)          |
|--------------------------------------------|-----------|-------------------|
| MRI findings (n=102)                       | (62/40)   | 0.85 (0.71- 0.98) |
| Subset of patients with negative CT (n=45) | (11/33/1) | 0.7 (0.37- 0.98)  |



**Supplementary Table 6.** The volumetric ROIs that show the most correlations to the lipids together with the frequencies and the sign of the average correlations.

| Frequency | Sign of correlation | Name                   |
|-----------|---------------------|------------------------|
| 0.159     | + (positive)        | RightAcumbens          |
| 0.129     | - (negative)        | LeftMedialParietalLobe |
| 0.129     | + (positive)        | RightSubcallosal       |
| 0.119     | + (positive)        | LeftBasalForebrain     |
| 0.119     | - (negative)        | LeftFusiformGyrus      |
| 0.114     | - (negative)        | RightBasalForebrain    |
| 0.109     | + (positive)        | LeftSubcallosal        |
| 0.104     | + (positive)        | LeftFrontalPole        |

**Supplementary Figure 1.** Beanpot of the correlation values of the volumetric ROIs to all the lipids. Predominantly negative correlations are seen which, on average, are at about -0.2.

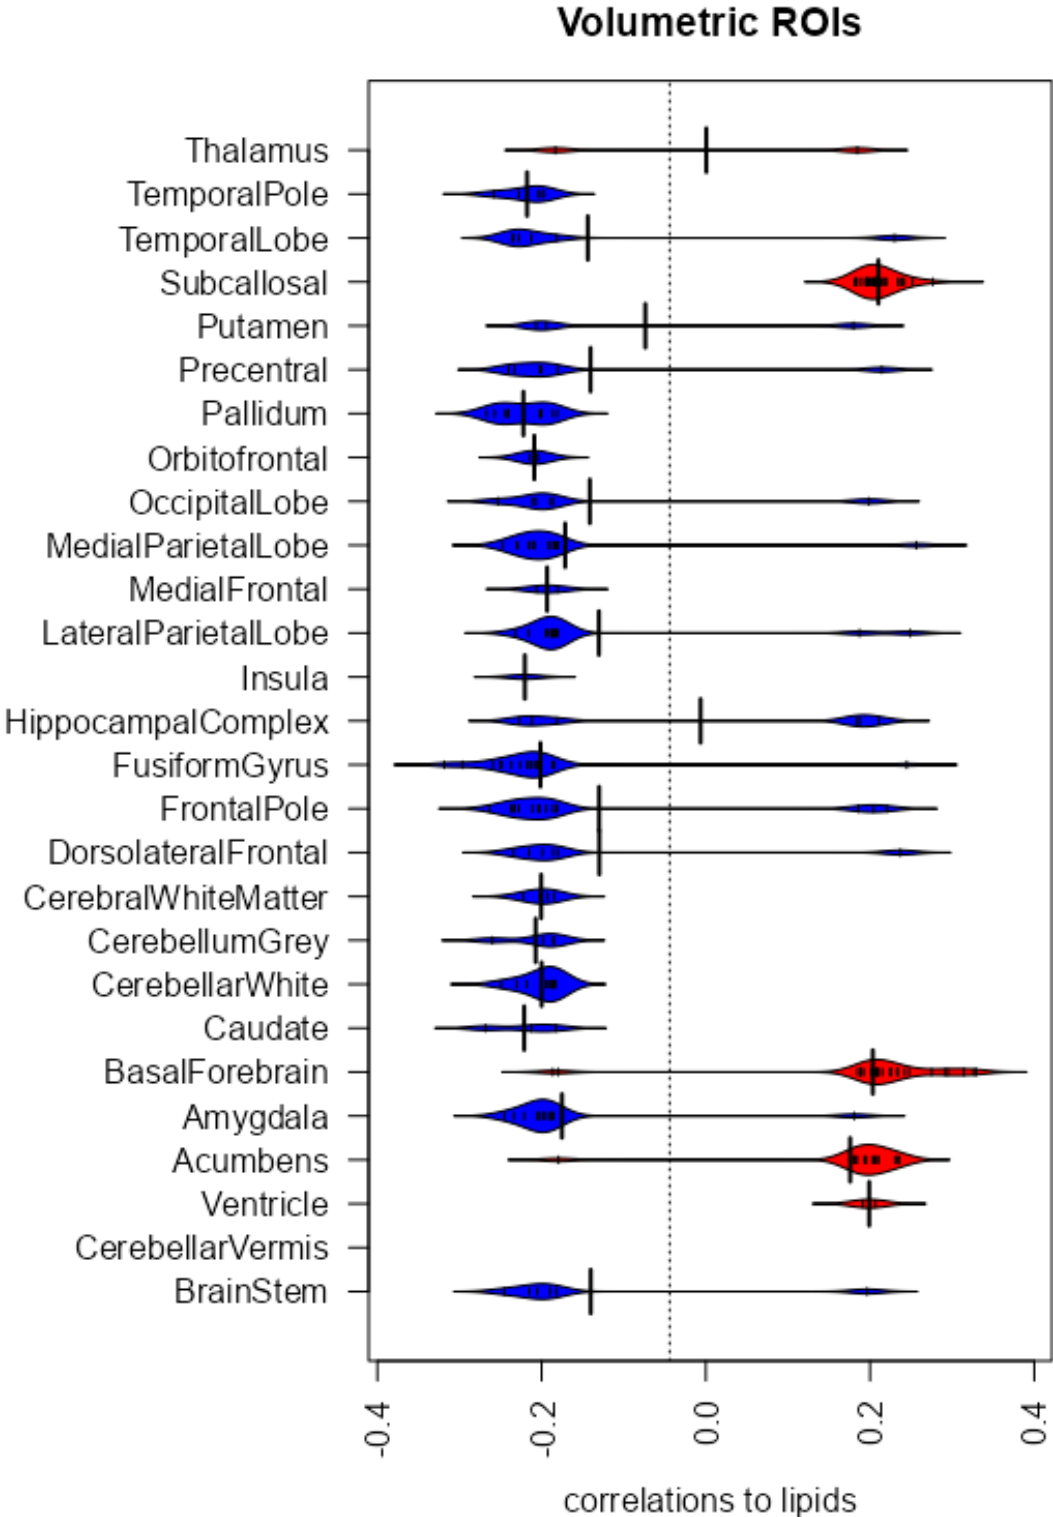

Supplement: Supplementary file [file media-1.pdf]
